# Supplementary material for: Discordance Between Severity of Heart Failure as Determined by Patient Report Versus Cardiopulmonary Exercise Testing
Source: PubMed Central journal article supplement — J Am Heart Assoc. 2021 Jun 26;10(13):e019864. doi: 10.1161/JAHA.120.019864 (PMC8403334; doi:10.1161/jaha.120.019864), 2021-06-26
Supplement: JAH3-10-e019864-s001.pdf [file JAH3-10-e019864-s001.pdf]

# **SUPPLEMENTAL MATERIAL**

**Table S1. Association of Concordant and Discordant Groups with Perceived Limitations.**

|                            | Beck Depression Inventory II Score |        | Multidimensional Scale of Perceived Social Support |        | Borg Rating at Peak Exercise |        |
|----------------------------|------------------------------------|--------|----------------------------------------------------|--------|------------------------------|--------|
|                            | $\beta$ Coefficient [95% CI]       | P      | $\beta$ Coefficient [95% CI]                       | P      | $\beta$ Coefficient [95% CI] | P      |
| Concordant-Lower Severity  | Ref.                               | ---    | Ref.                                               | ---    | Ref.                         | ---    |
| Symptom Magnifier          | 7.34 [6.43, 8.26]                  | <0.001 | -0.46 [-0.61, -0.31]                               | <0.001 | 0.38 [0.08, 0.67]            | 0.012  |
| Symptom Minimizer          | 0.19 [-0.76, 1.13]                 | 0.70   | 0.00 [-0.15, 0.15]                                 | 0.98   | 0.05 [-0.25, 0.36]           | 0.74   |
| Concordant-Higher Severity | 7.54 [6.64, 8.44]                  | <0.001 | -0.31 [-0.46, -0.17]                               | <0.001 | 0.54 [0.25, 0.82]            | <0.001 |

95% CI are displayed as [lower bound, upper bound].

Models were adjusted for age, sex, and race.

**Table S2. Association of Concordant and Discordant Groups with Baseline Perception of Limitations as Assessed by BDI II and EuroQoL Questions.**

|                            | Beck Depression Inventory II |        |                   |        |                   |        |                   |        | EuroQoL           |        |                      |        |
|----------------------------|------------------------------|--------|-------------------|--------|-------------------|--------|-------------------|--------|-------------------|--------|----------------------|--------|
|                            | Pessimism                    |        | Past Failure      |        | Self-Dislike      |        | Self-Criticalness |        | Immobility        |        | Anxiety / Depression |        |
|                            | OR<br>[95%<br>CI]            | P      | OR<br>[95%<br>CI] | P      | OR<br>[95%<br>CI] | P      | OR<br>[95%<br>CI] | P      | OR<br>[95%<br>CI] | P      | OR<br>[95%<br>CI]    | P      |
| Concordant-Lower Severity  | Ref.                         | ---    | Ref.              | ---    | Ref.              | ---    | Ref.              | ---    | Ref.              | ---    | Ref.                 | ---    |
| Symptom Magnifier          | 1.3<br>[1.2-1.3]             | <0.001 | 1.2<br>[1.1-1.3]  | <0.001 | 1.2<br>[1.1-1.3]  | <0.001 | 1.2<br>[1.1-1.3]  | <0.001 | 1.5<br>[1.4-1.6]  | <0.001 | 1.3<br>[1.2-1.4]     | <0.001 |
| Symptom Minimizer          | 1.0<br>[0.9-1.0]             | 0.06   | 1.0<br>[0.9-1.0]  | 0.42   | 1.0<br>[0.9-1.1]  | 0.87   | 1.0<br>[0.9-1.1]  | 0.83   | 1.1<br>[1.0-1.2]  | 0.004  | 1.0<br>[0.9-1.0]     | 0.53   |
| Concordant-Higher Severity | 1.3<br>[1.2-1.3]             | <0.001 | 1.1<br>[1.1-1.2]  | <0.001 | 1.2<br>[1.1-1.3]  | <0.001 | 1.2<br>[1.1-1.3]  | <0.001 | 1.6<br>[1.5-1.7]  | <0.001 | 1.3<br>[1.2-1.4]     | <0.001 |

Models were adjusted for age, sex, and race.

**Table S3. Cox Proportional Hazards of Long-term Clinical Outcomes by Concordant and Discordant Groups.**

|                            | All-Cause Mortality or All-Cause Hospitalization |        | All-Cause Mortality |        | All-Cause Hospitalization |        |
|----------------------------|--------------------------------------------------|--------|---------------------|--------|---------------------------|--------|
|                            | HR [95% CI]                                      | P      | HR [95% CI]         | P      | HR [95% CI]               | P      |
| Concordant-Lower Severity  | Ref.                                             | ---    | Ref.                | ---    | Ref.                      | ---    |
| Symptom Magnifier          | 1.31 [1.12-1.53]                                 | <0.001 | 1.42 [0.98-2.04]    | 0.063  | 1.39 [1.17-1.66]          | <0.001 |
| Symptom Minimizer          | 1.37 [1.17-1.60]                                 | <0.001 | 1.79 [1.28-2.51]    | <0.001 | 1.42 [1.19-1.70]          | <0.001 |
| Concordant-Higher Severity | 1.86 [1.60-2.15]                                 | <0.001 | 2.43 [1.77-3.34]    | <0.001 | 1.92 [1.63-2.26]          | <0.001 |

Models were adjusted for age, sex, race, depression, and obesity.

**Figure S1. Scatter Plot Examining the Relationship between KCCQ Clinical Summary Score and  $V_E/V_{CO_2}$  Slope.**

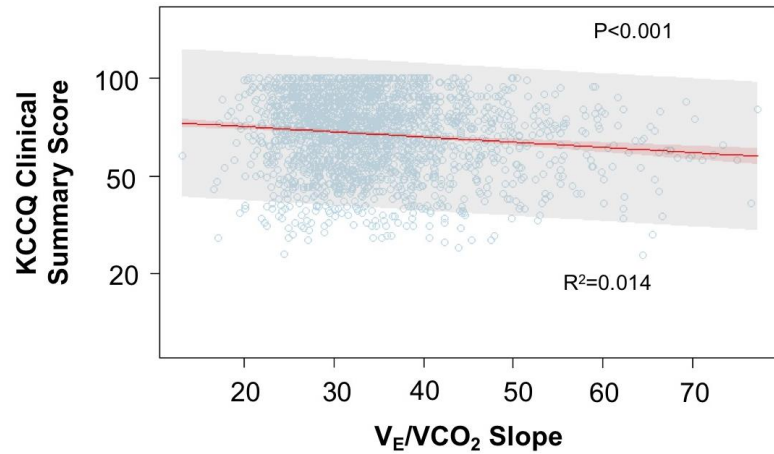

The fitted line represents the linear regression model. The overall model was statistically significant ( $P<0.001$ ) but explained only 1.4% of this relationship ( $R^2=0.014$ )

**Figure S2. Kaplan-Meier Survival Curves for Time to Clinical Outcomes Stratified by Concordant and Discordant Groups Using Peak VO<sub>2</sub> as the Objective Measure of Heart Failure Severity.**

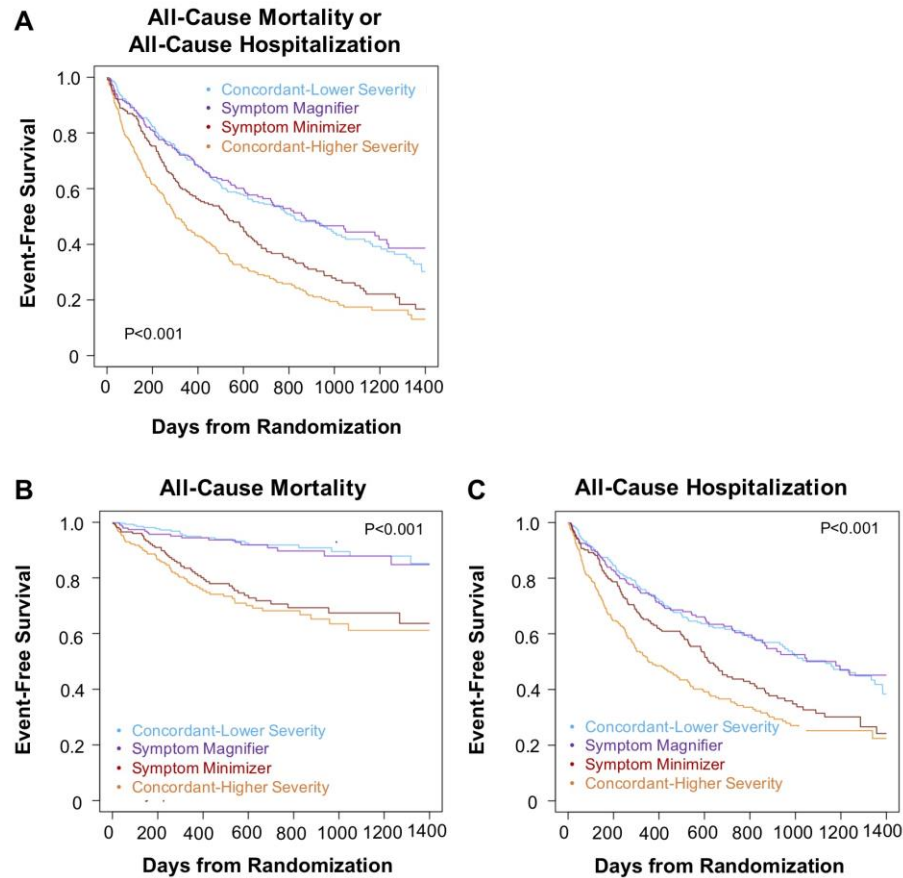

Kaplan-Meier survival curves are shown for time to A) all-cause mortality or all-cause hospitalization (P < 0.001 for all comparisons), B) all-cause mortality (P < 0.001 for all comparisons), and C) all-cause hospitalization (P < 0.001 for all comparisons)
